# Supplementary material for: One-Pot Synthesis, E-/Z-Equilibrium in Solution of 3-Hetarylaminomethylidenefuran-2(3H)-ones and the Way to Selective Synthesis of the E-Enamines
Source: MDPI journal article supplement (doi:10.3390/molecules28030963), 2023-01-18

## Supplementary Materials

# ***One-Pot Synthesis, E-/Z-Equilibrium in Solution of 3-Hetarylaminomethylidenefuran-2(3H)-ones and the Way to Selective Synthesis of the E-Enamines***

Alexandra S. Tikhomolova <sup>1,\*</sup>, Vyacheslav S. Grinev <sup>1,2</sup> and Alevtina Yu. Yegorova <sup>1</sup>

<sup>1</sup> Institute of Chemistry, N.G. Chernyshevsky Saratov National Research State University, 83 Ulitsa Astrakhanskaya, Saratov 410012, Russia; grinevvs@sgu.ru (V.S.G.); yegorovaay@gmail.com (A.Y.Y.);

<sup>2</sup> Institute of Biochemistry and Physiology of Plants and Microorganisms—Subdivision of the Federal State Budgetary Research Institution Saratov Federal Scientific Centre of the Russian Academy of Sciences (IBPPM RAS), 13 Prospekt Entuziastov, Saratov 410049, Russia

\* Correspondence: bondartsova.alexandra@yandex.ru

### Table of content

|                                                                                |    |
|--------------------------------------------------------------------------------|----|
| The <sup>1</sup> H & <sup>13</sup> C, NOESY NMR spectrum of compound <b>9a</b> | S2 |
| The <sup>1</sup> H NMR spectrum of compound <b>9b</b>                          | S3 |
| The <sup>1</sup> H & <sup>13</sup> C NMR spectrum of compound <b>9c</b>        | S4 |
| The <sup>1</sup> H & <sup>13</sup> C NMR spectrum of compound <b>9d</b>        | S5 |
| The <sup>1</sup> H & <sup>13</sup> C NMR spectrum of compound <b>9e</b>        | S6 |
| The <sup>1</sup> H & <sup>13</sup> C NMR spectrum of compound <b>9f</b>        | S7 |

Figure S1.  $^1\text{H}$  &  $^{13}\text{C}$  NMR of 9a

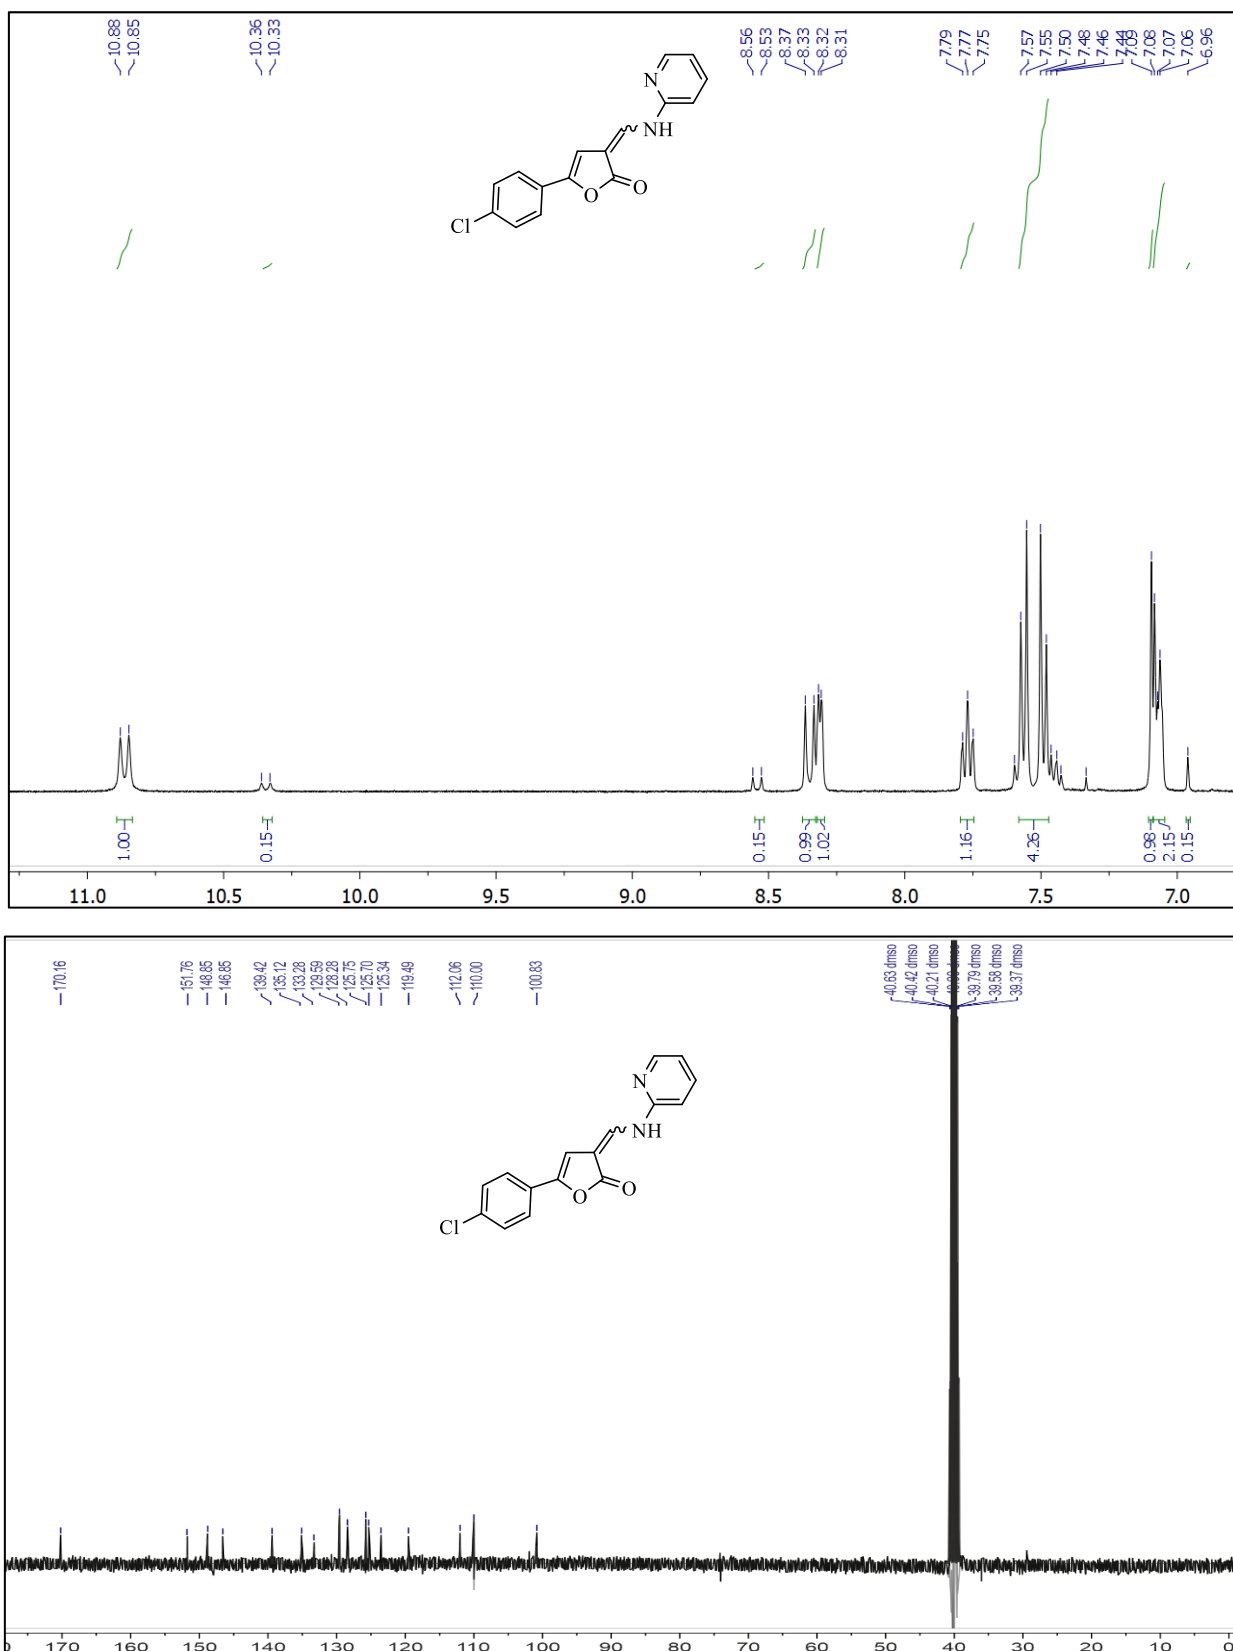

**Figure S2. NOESY of 9a**

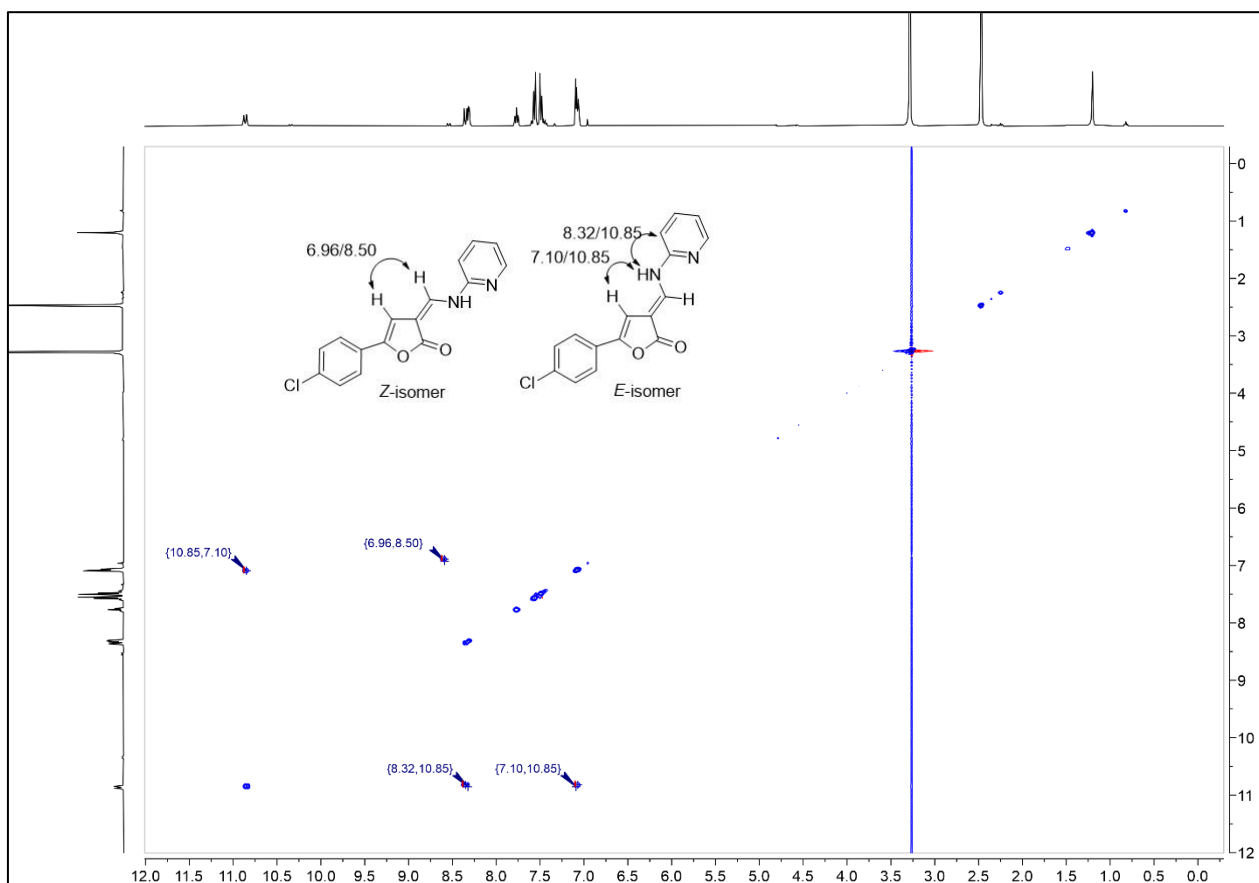

**<sup>1</sup>H NMR of 9b**

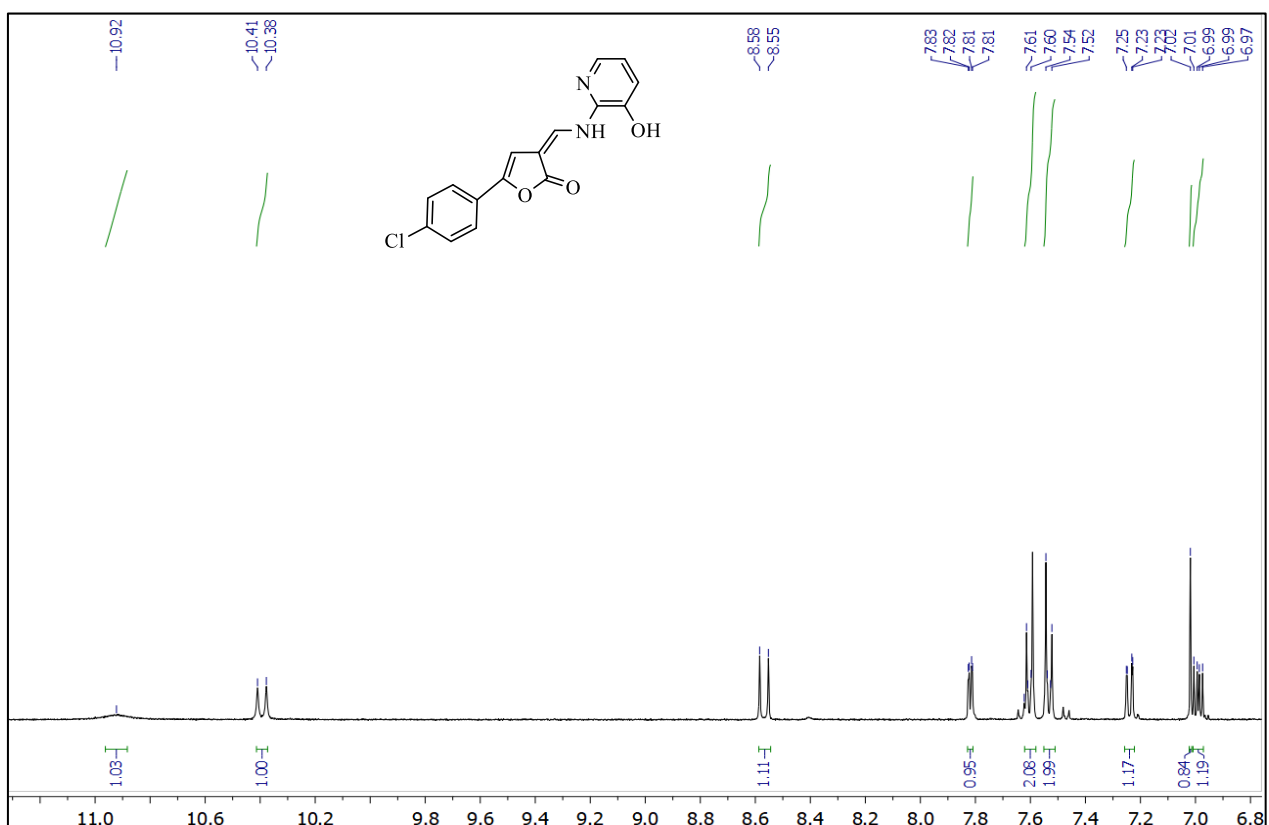

Figure S3.  $^1\text{H}$  &  $^{13}\text{C}$  NMR of 9c

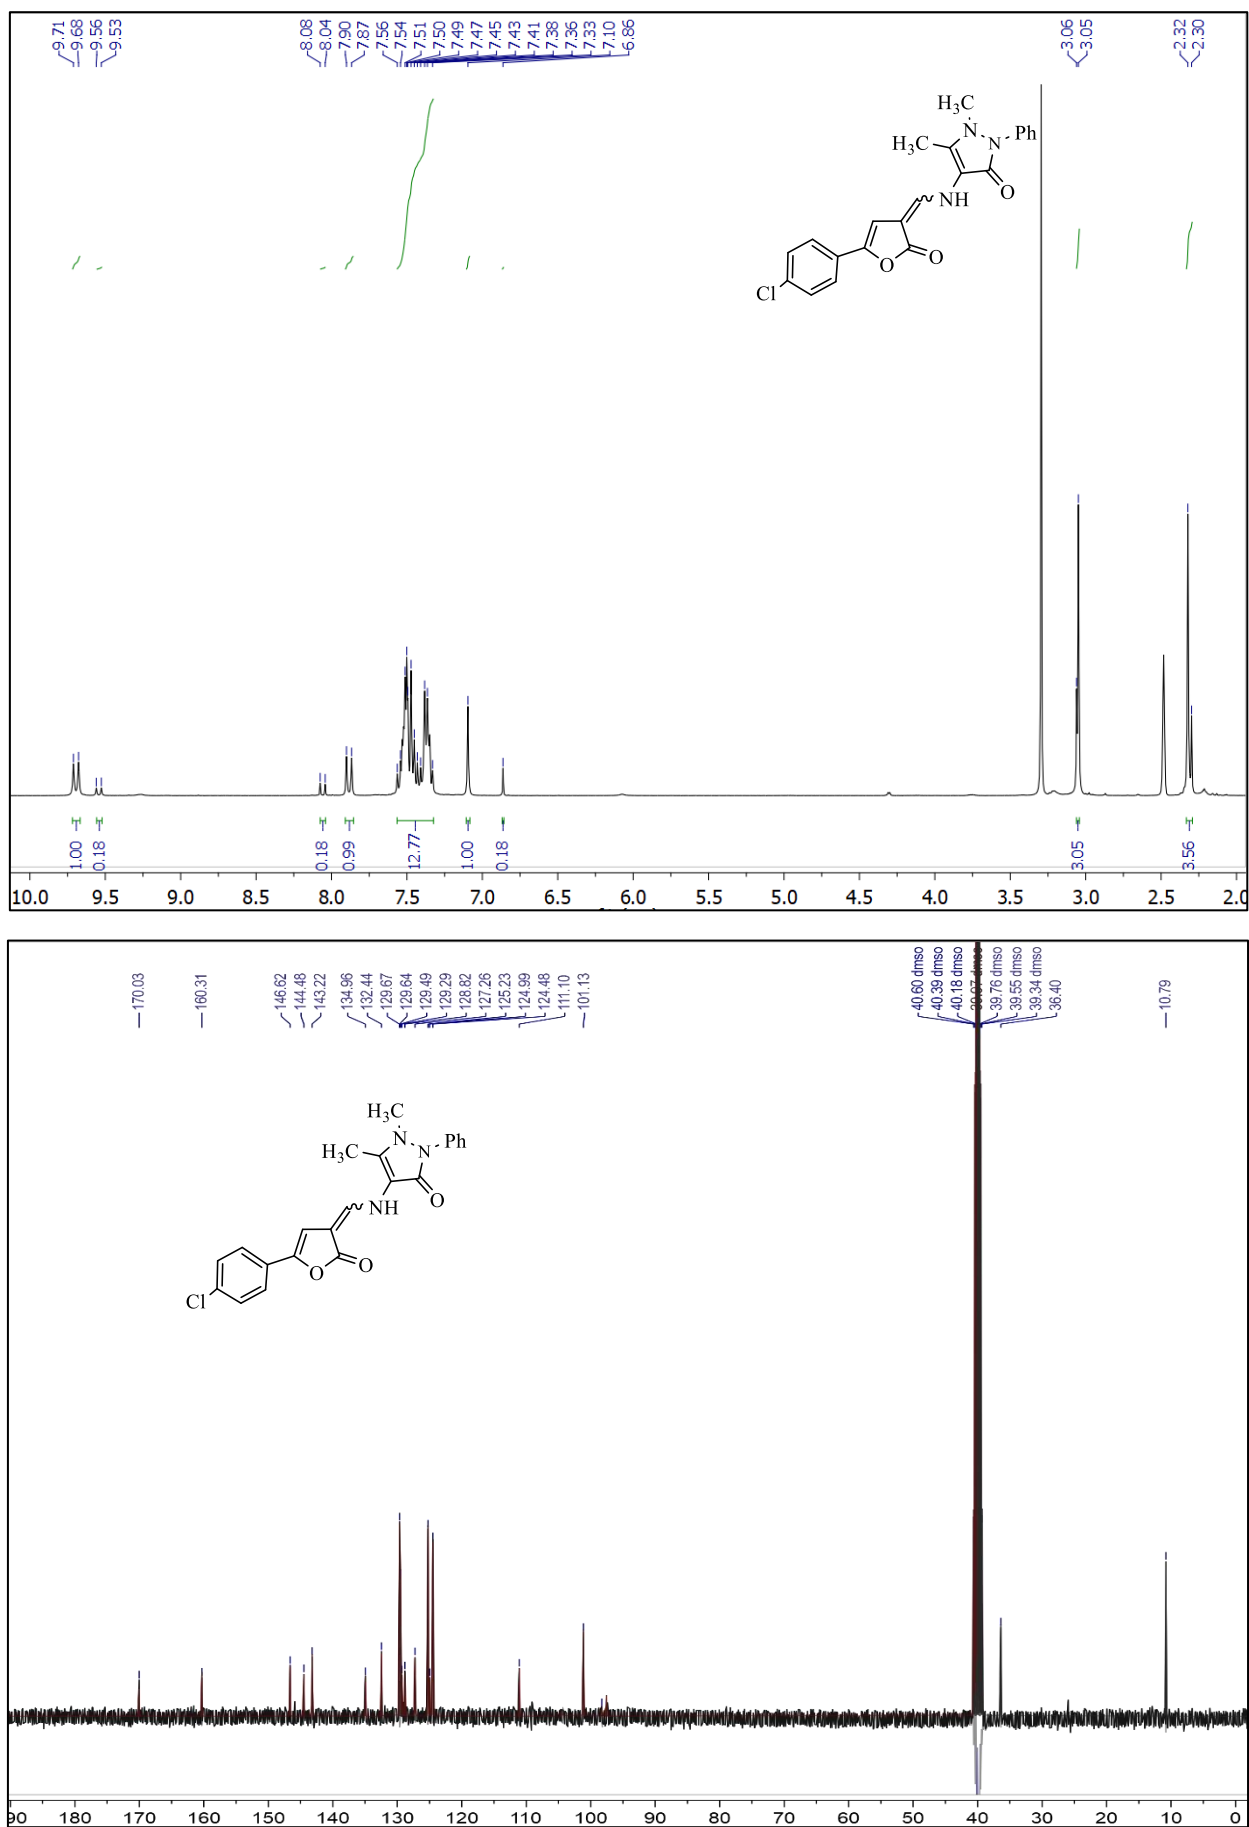

Figure S4.  $^1\text{H}$  &  $^{13}\text{C}$  NMR of 9d

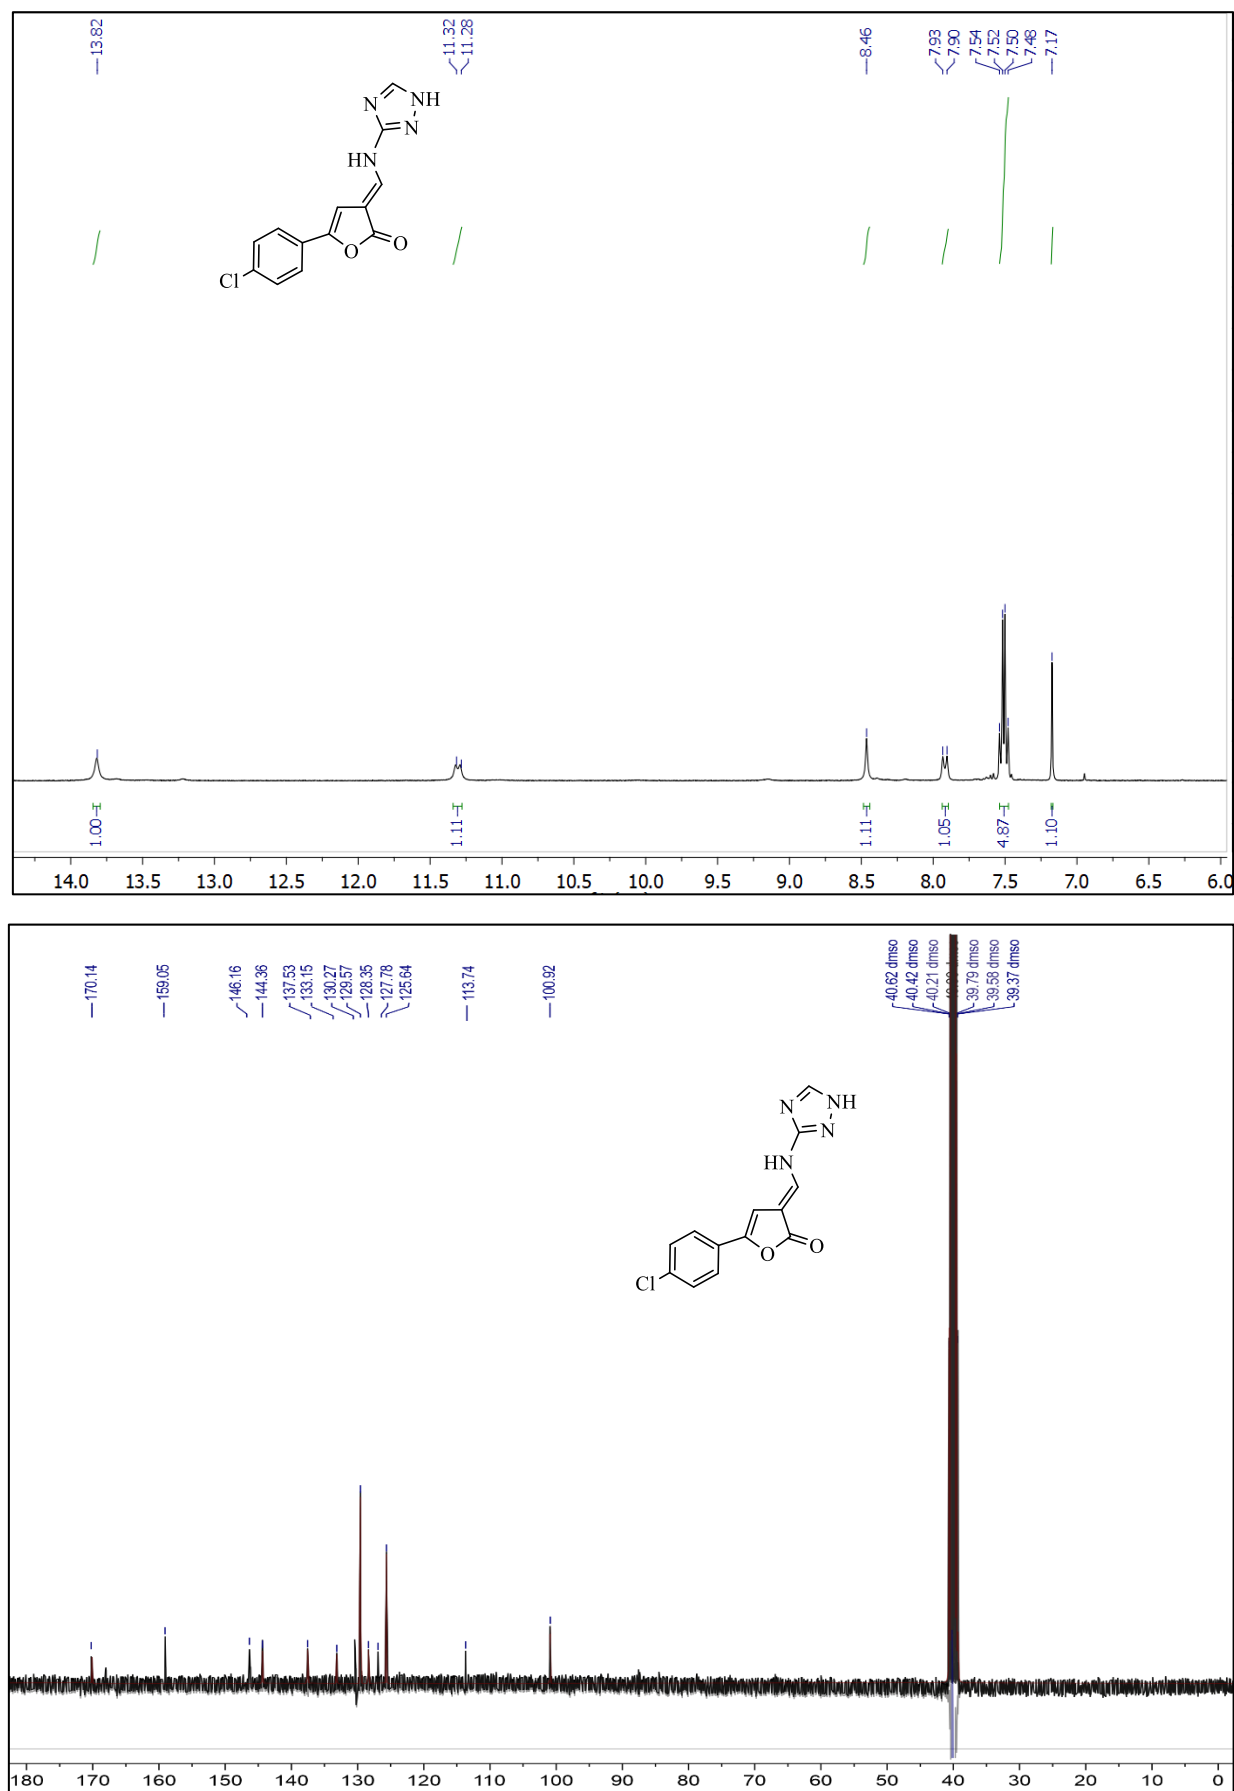

Figure S5.  $^1\text{H}$  &  $^{13}\text{C}$  NMR of 9e

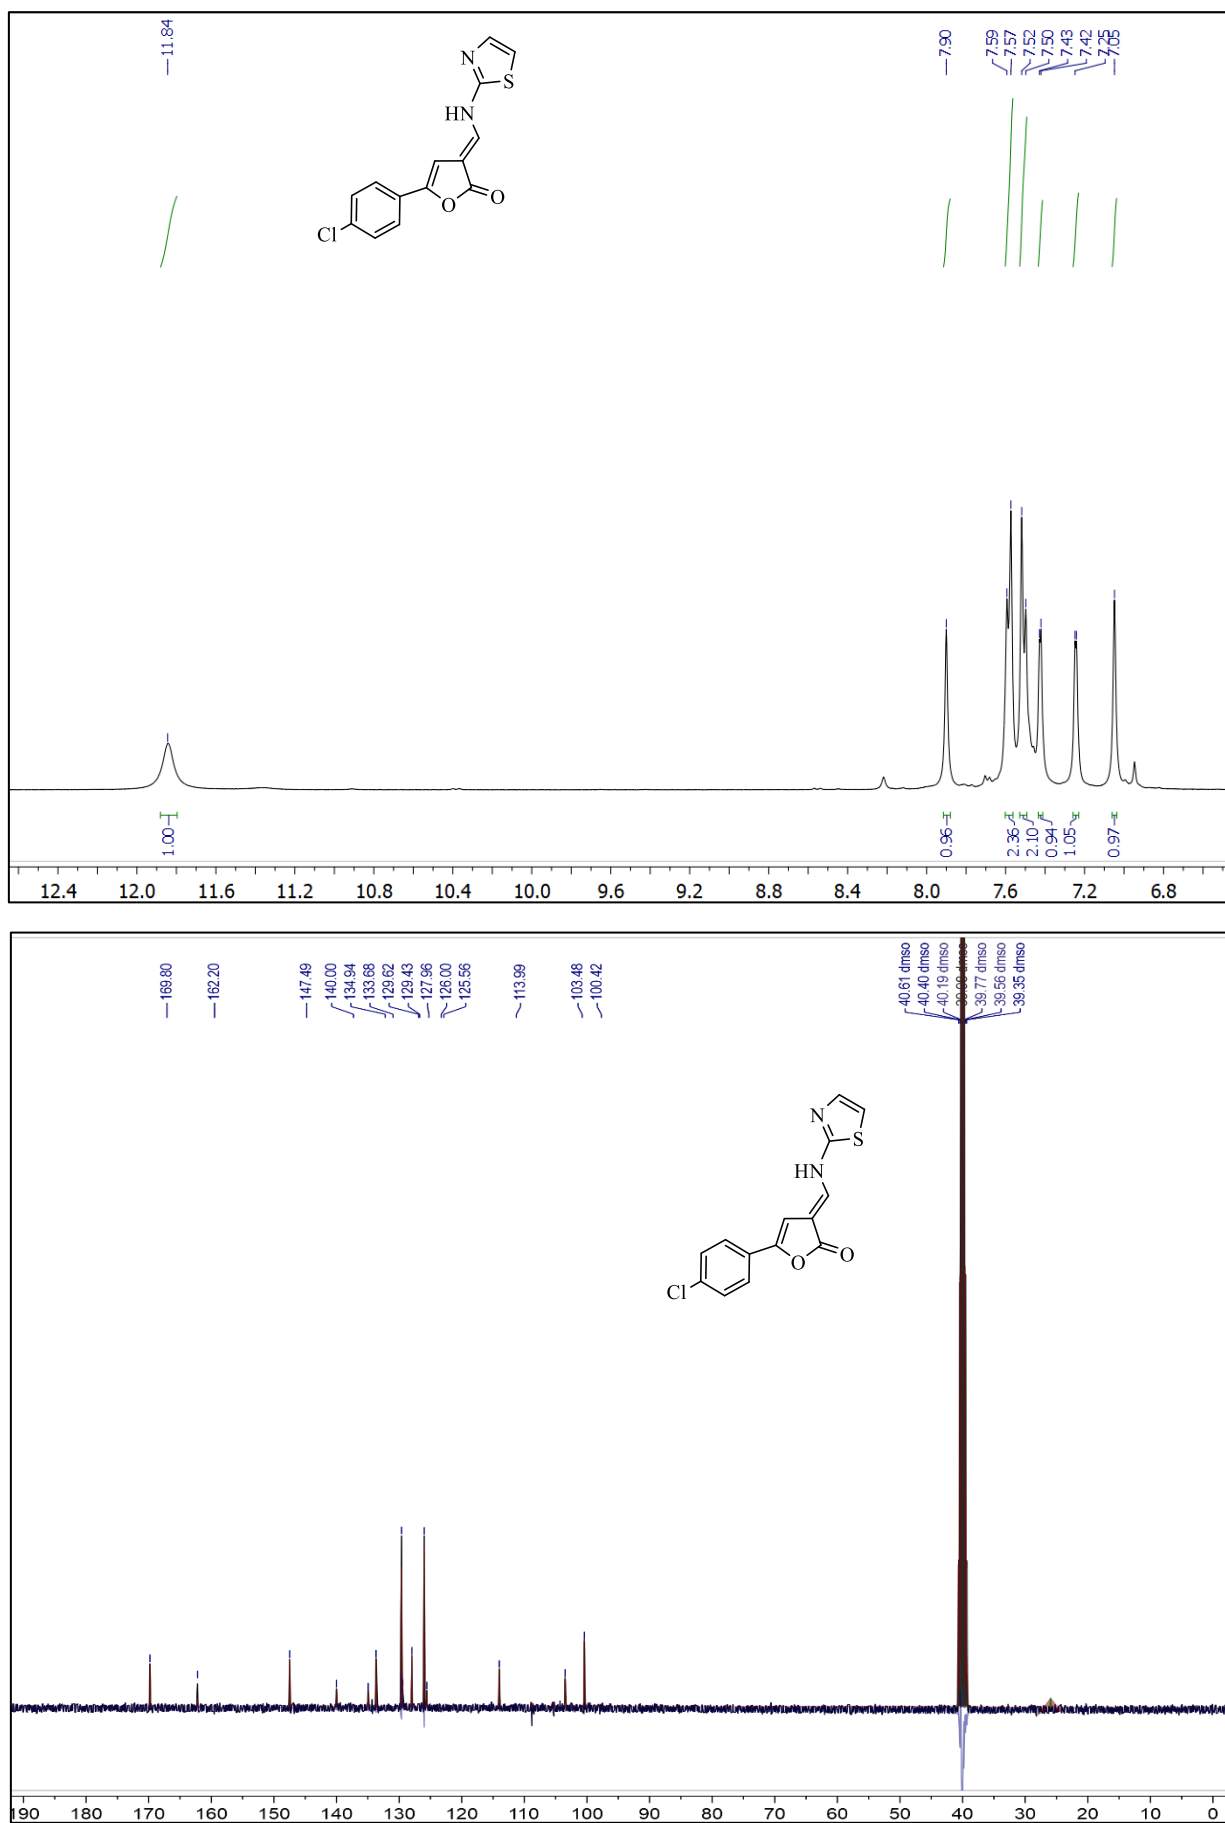

Figure S6.  $^1\text{H}$  &  $^{13}\text{C}$  NMR of 9f

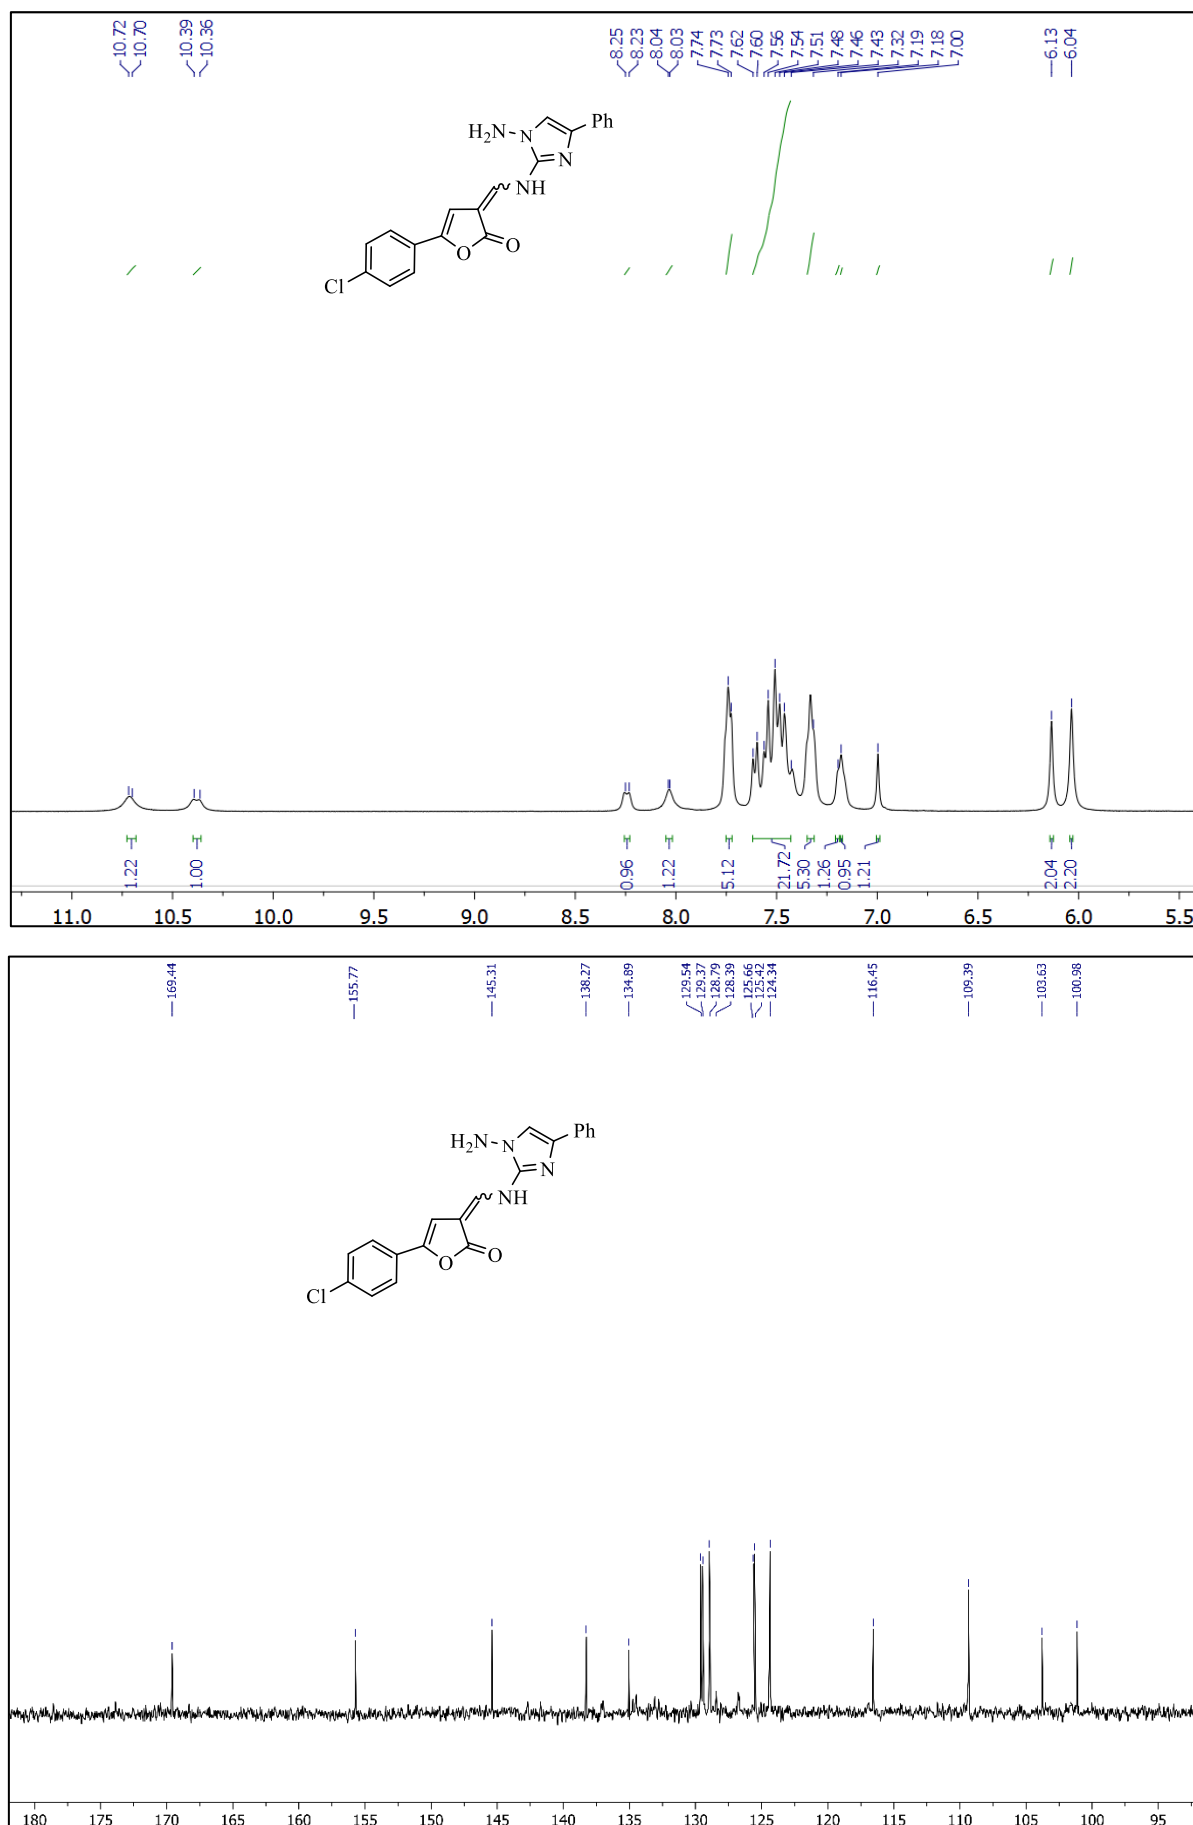

Supplement: s1 [file s1]
